# Supplementary material for: Mesenchymal Stem Cell-Derived Exosomes Modulate Chondrocyte Glutamine Metabolism to Alleviate Osteoarthritis Progression
Source: PubMed Central journal article supplement (PMC8724850; doi:10.1155/2021/2979124), 2021-12-27

**A**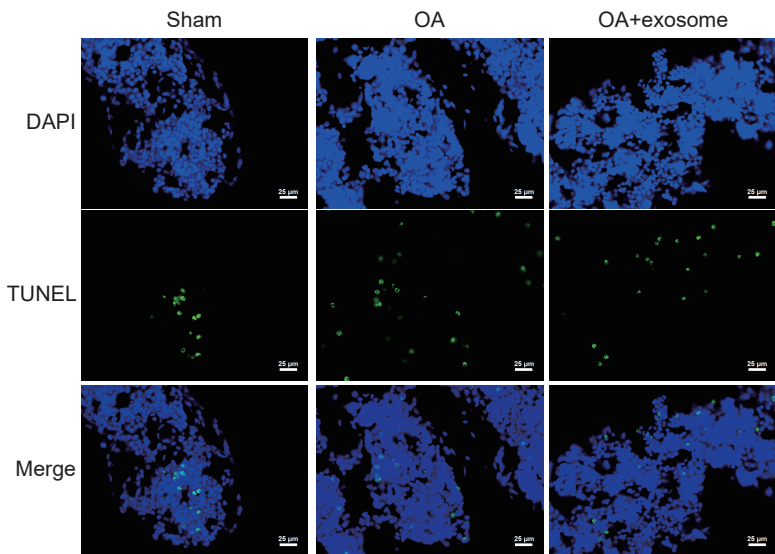**B**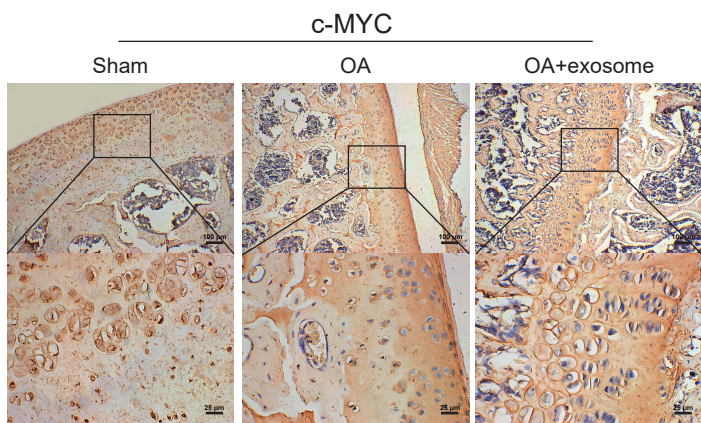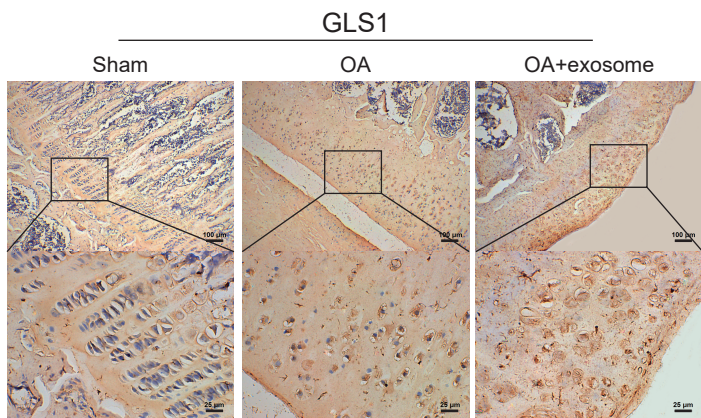

Supplement: 2979124.f3.pdf [file 2979124.f3.pdf]
