# Supplementary material for: Mesenchymal Stem Cell‐Derived Exosomes Modulate Chondrocyte Glutamine Metabolism to Alleviate Osteoarthritis Progression
Source: Hindawi journal article supplement (doi:10.1155/2021/2979124), 2021-01-01

**A**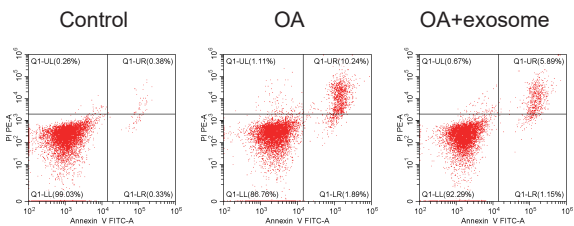**B**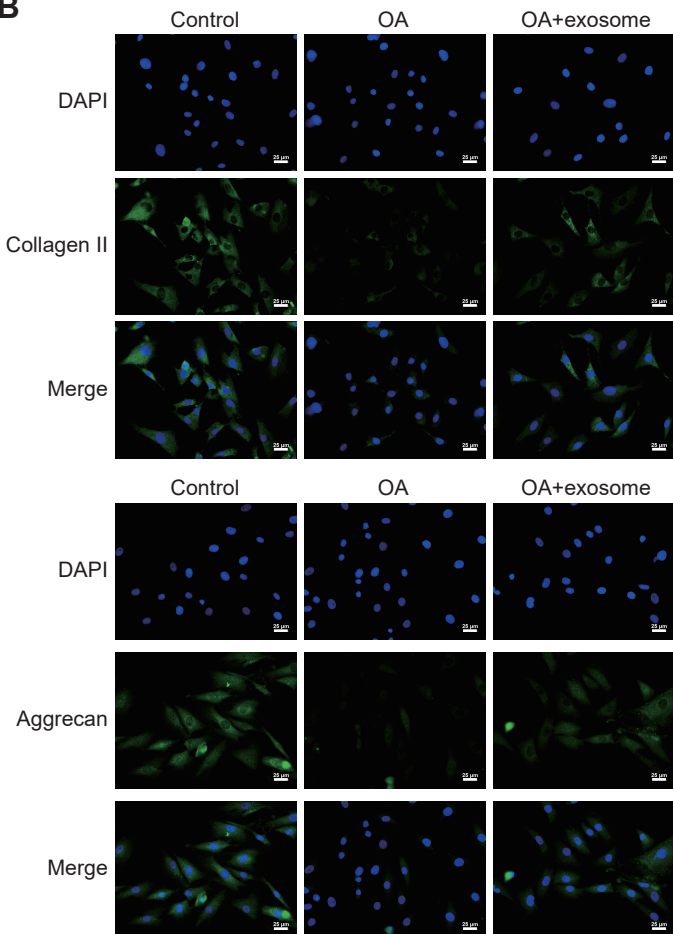

Supplement: f1 [file 2979124.f1.pdf]
